# Supplementary material for: Sorption of arsenate on cerium oxide: a simulated infrared and Raman spectroscopic identification
Source: Royal Society of Chemistry journal article supplement (doi:10.1039/d4en00894d), 2025-01-01
Supplement: d4en00894d1.pdf [file d4en00894d1.pdf]

## Supplementary Material

### Sorption of Arsenate on Cerium Oxide: A Simulated Infrared and Raman Spectroscopic Identification

Khoa Minh Ta,<sup>a</sup> Deyontae O. Wisdom,<sup>a</sup> Lisa J. Gillie,<sup>a</sup> David J. Cooke,<sup>a</sup> Runliang Zhu,<sup>b,c,d</sup> Mário A. Gonçalves,<sup>e</sup> Stephen C. Parker,<sup>f</sup> and Marco Molinari<sup>a,\*</sup>

<sup>a</sup> Department of Physical and Life Sciences, School of Applied Sciences, University of Huddersfield, Queensgate, Huddersfield HD1 3DH, UK

<sup>b</sup> CAS Key Laboratory of Mineralogy and Metallogeny, Guangdong Provincial Key Laboratory of Mineral Physics and Materials, Guangzhou Institute of Geochemistry, Chinese Academy of Sciences, Guangzhou 510640, China

<sup>c</sup> CAS Center for Excellence in Deep Earth Science, Guangzhou 510640, China

<sup>d</sup> University of Chinese Academy of Sciences, Beijing 100049, China

<sup>e</sup> Department of Geology, Faculty of Sciences, University of Lisbon, Campo Grande, 1749-016 Lisbon, Portugal

<sup>f</sup> Department of Chemistry, University of Bath, Claverton Down, Bath BA2 7AY, UK

\* Corresponding author: [m.molinari@hud.ac.uk](mailto:m.molinari@hud.ac.uk)

The adsorption energy is calculated using:

$$E_{\text{ads}} = \frac{E_{\text{surf+ars}} - (E_{\text{surf}} + n_{\text{ars}} \times E_{\text{ars}})}{n_{\text{ars}}} \quad \text{Equation S1}$$

where  $E_{\text{surf+ars}}$  is the energy of the surface with the adsorbed Arsenate,  $E_{\text{surf}}$  is the energy of the bare surface, and  $E_{\text{ars}}$  and  $n_{\text{ars}}$  are the energy and the number of arsenate species adsorbed to the surface. Table S1 lists the adsorption energies, while Table S2 reports the degree of dissociation of the  $\text{H}_3\text{AsO}_4$  molecule when adsorbed to the three surfaces in different configurations.

**Table S1:** Adsorption energies of all stable configurations of arsenic acid adsorbed onto the stoichiometric {111}, {110}, and {100} surfaces of  $\text{CeO}_2$ . The labelling scheme for the configurations is described in the text.

| Surface | Configuration              | Adsorption energy (eV) |                                                |                   |
|---------|----------------------------|------------------------|------------------------------------------------|-------------------|
|         |                            | This work (PBE+U)      | Previous work – Phosphate (PBE+U) <sup>1</sup> | $\Delta E$ (As-P) |
| {111}   | {111}-5OAs-1O <sub>s</sub> | -1.90                  | -1.13                                          | -0.77             |
|         | {111}-4OAs-2O <sub>s</sub> | -1.31                  | -1.56                                          | 0.25              |
|         | {111}-4OAs-3O <sub>s</sub> | -1.66                  | -1.76                                          | 0.1               |
| {110}   | {110}-5OAs-1O <sub>s</sub> | -2.14                  | -1.34                                          | -0.8              |
|         | {110}-4OAs-2O <sub>s</sub> | -2.98                  | -2.93                                          | -0.05             |
|         | {110}-4OAs-3O <sub>s</sub> | -2.36                  | -2.46                                          | 0.1               |
| {100}   | {100}-5OAs-2O <sub>s</sub> | -2.79                  | -1.92                                          | -0.87             |
|         | {100}-4OAs-1O <sub>s</sub> | -2.26                  | -2.33                                          | 0.07              |
|         | {100}-4OAs-2O <sub>s</sub> | -3.47                  | -3.56                                          | 0.09              |
|         | {100}-4OAs-3O <sub>s</sub> | -4.14                  | -4.53                                          | 0.39              |

**Table S2:** Degree of dissociation of arsenic acid when adsorbed onto the stoichiometric {111}, {110}, and {100} surfaces of  $\text{CeO}_2$  in different configurations. The labelling scheme for the configurations is described in the text.

| Surface | Configuration              | Dissociation of $\text{H}_3\text{AsO}_4$                                   |
|---------|----------------------------|----------------------------------------------------------------------------|
| {111}   | {111}-5OAs-1O <sub>s</sub> | $\text{H}_3\text{AsO}_4 \rightarrow \text{H}_2\text{AsO}_4^- + \text{H}^+$ |
|         | {111}-4OAs-2O <sub>s</sub> | $\text{H}_3\text{AsO}_4 \rightarrow \text{HAsO}_4^{2-} + 2\text{H}^+$      |
|         | {111}-4OAs-3O <sub>s</sub> | $\text{H}_3\text{AsO}_4 \rightarrow \text{HAsO}_4^{2-} + 2\text{H}^+$      |
| {110}   | {110}-5OAs-1O <sub>s</sub> | No dissociation                                                            |
|         | {110}-4OAs-2O <sub>s</sub> | $\text{H}_3\text{AsO}_4 \rightarrow \text{H}_2\text{AsO}_4^- + \text{H}^+$ |
|         | {110}-4OAs-3O <sub>s</sub> | $\text{H}_3\text{AsO}_4 \rightarrow \text{HAsO}_4^{2-} + 2\text{H}^+$      |
| {100}   | {100}-5OAs-2O <sub>s</sub> | No dissociation                                                            |
|         | {100}-4OAs-1O <sub>s</sub> | $\text{H}_3\text{AsO}_4 \rightarrow \text{H}_2\text{AsO}_4^- + \text{H}^+$ |
|         | {100}-4OAs-2O <sub>s</sub> | $\text{H}_3\text{AsO}_4 \rightarrow \text{HAsO}_4^{2-} + 2\text{H}^+$      |
|         | {100}-4OAs-3O <sub>s</sub> | $\text{H}_3\text{AsO}_4 \rightarrow \text{HAsO}_4^{2-} + 2\text{H}^+$      |

Table S3 compares selected bond lengths from our models to experimental measurements and previous DFT calculations on cerium gasparite ( $\text{CeAsO}_4$ ), and arsenic acid ( $\text{H}_3\text{AsO}_4$ ). As described in the text, we use the notation  $\text{O}_p$  to denote phosphoryl oxygen atoms,  $\text{O}_{\text{surf}}$  for surface oxygen atoms, and  $^*\text{O}_{\text{surf}}$  for the surface O atoms bound directly to As atoms.

**Table S3.** Comparison of selected bond lengths in our models to experimental measurements and previous DFT arsenic acid ( $\text{H}_3\text{AsO}_4$ ).  $\text{O}_{\text{surf}}$ ,  $^*\text{O}_{\text{surf}}$ ,  $\text{O}_p$ ,  $\text{O}_{\text{As}}$  denote, respectively, surface oxygen atoms, surface oxygen atom directly bound to phosphorus atoms, the phosphoryl oxygen atoms, and the arsenic oxygen atoms.

|                                                | Bond                               | Bond length (Å)              |                                         |
|------------------------------------------------|------------------------------------|------------------------------|-----------------------------------------|
|                                                |                                    | This work (PBE+U)            | Literature (Experimental.) <sup>2</sup> |
| <b>CeAsO<sub>4</sub> (Cerium Gasparite)</b>    | As-O <sub>As</sub>                 | -                            | 1.68, 1.69, 1.70                        |
|                                                | Ce-O <sub>As</sub>                 | -                            | 2.47, 2.46, 2.56                        |
|                                                | As-O <sub>As</sub>                 | -                            |                                         |
|                                                | Ce-O <sub>As</sub>                 | -                            |                                         |
| <b>H<sub>3</sub>AsO<sub>4</sub> (DFT)</b>      | As-O <sub>As</sub>                 | 1.77                         |                                         |
|                                                | As=O <sub>As</sub>                 | 1.64                         |                                         |
| <b>{111}-5O<sub>As</sub>-1O<sub>surf</sub></b> | As- <sup>*</sup> O <sub>surf</sub> | 2.01                         |                                         |
|                                                | As-O <sub>As</sub>                 | 1.72, 1.82, 1.84, 1.71       |                                         |
|                                                | Ce-O <sub>As</sub>                 | 2.39, 2.65, 2.40             |                                         |
|                                                | Ce- <sup>*</sup> O <sub>surf</sub> | 2.39, 2.31, 2.38             |                                         |
| <b>{110}-5O<sub>As</sub>-1O<sub>surf</sub></b> | As- <sup>*</sup> O <sub>surf</sub> | 1.81                         |                                         |
|                                                | As-O <sub>As</sub>                 | 1.80, 1.89, 1.73, 1.86       |                                         |
|                                                | Ce-O <sub>As</sub>                 | 2.33, 2.53                   |                                         |
|                                                | Ce- <sup>*</sup> O <sub>surf</sub> | 2.54, 2.64                   |                                         |
| <b>{100}-5O<sub>As</sub>-2O<sub>surf</sub></b> | As- <sup>*</sup> O <sub>surf</sub> | 1.80                         |                                         |
|                                                | As-O <sub>As</sub>                 | 1.76, 1.97, 1.77, 1.80       |                                         |
|                                                | Ce-O <sub>As</sub>                 | 2.57, 2.66, 2.45, 2.43       |                                         |
|                                                | Ce- <sup>*</sup> O <sub>surf</sub> | 2.41, 2.48                   |                                         |
| <b>{111}-4O<sub>As</sub>-3O<sub>surf</sub></b> | Ce-O <sub>As</sub>                 | 2.36, 2.42, 2.54             |                                         |
| <b>{110}-4O<sub>As</sub>-3O<sub>surf</sub></b> | Ce-O <sub>As</sub>                 | 2.36, 2.61, 2.61             |                                         |
| <b>{100}-4O<sub>As</sub>-3O<sub>surf</sub></b> | Ce-O <sub>As</sub>                 | 2.34, 2.38, 2.47, 2.63, 2.79 |                                         |
| <b>{111}-4O<sub>As</sub>-2O<sub>surf</sub></b> | Ce-O <sub>As</sub>                 | 2.30, 2.30                   |                                         |
| <b>{110}-4O<sub>As</sub>-2O<sub>surf</sub></b> | Ce-O <sub>As</sub>                 | 2.34, 2.34                   |                                         |
| <b>{100}-4O<sub>As</sub>-2O<sub>surf</sub></b> | Ce-O <sub>As</sub>                 | 2.39, 2.48, 2.60, 2.51       |                                         |
| <b>{100}-4O<sub>As</sub>-1O<sub>surf</sub></b> | Ce-O <sub>As</sub>                 | 2.39, 2.41                   |                                         |

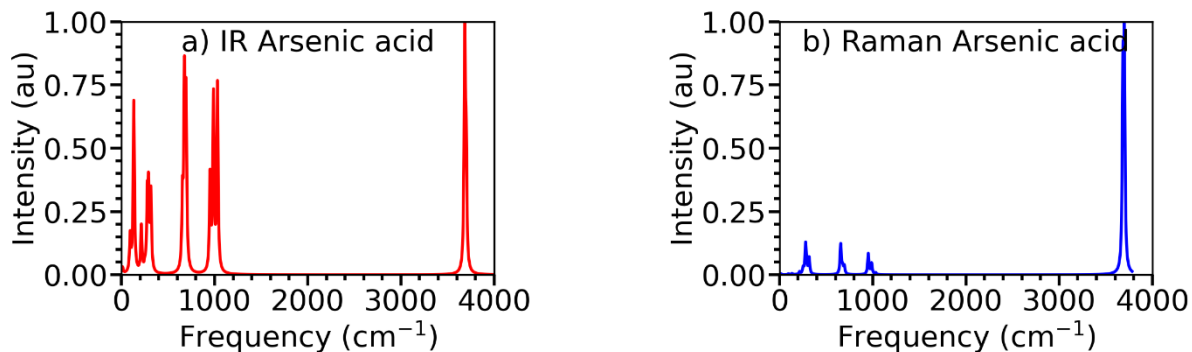

**Figure S1:** Simulated IR (a) and Raman spectra (b) of isolated  $\text{H}_3\text{AsO}_4$ .

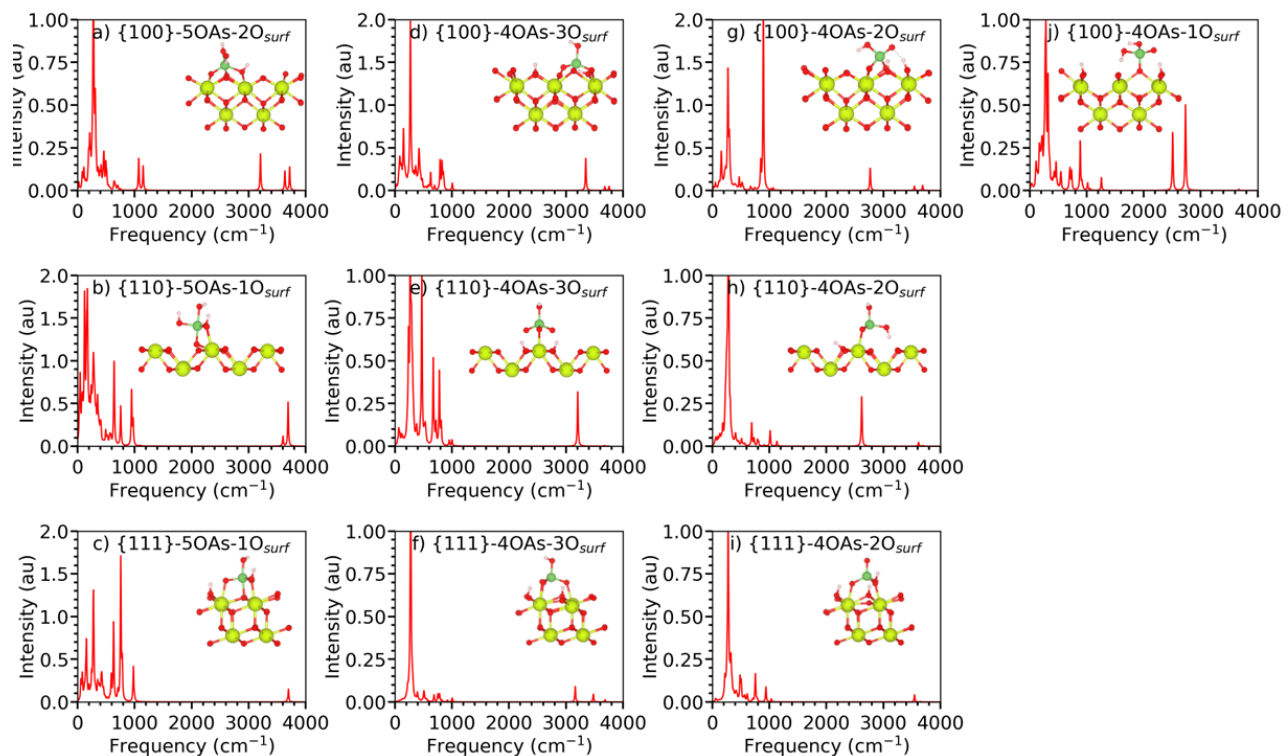

**Figure S2:** Simulated IR spectra of raw data of arsenate species adsorbed onto the  $\{111\}$ ,  $\{110\}$ , and  $\{100\}$  stoichiometric surfaces of  $\text{CeO}_2$ .

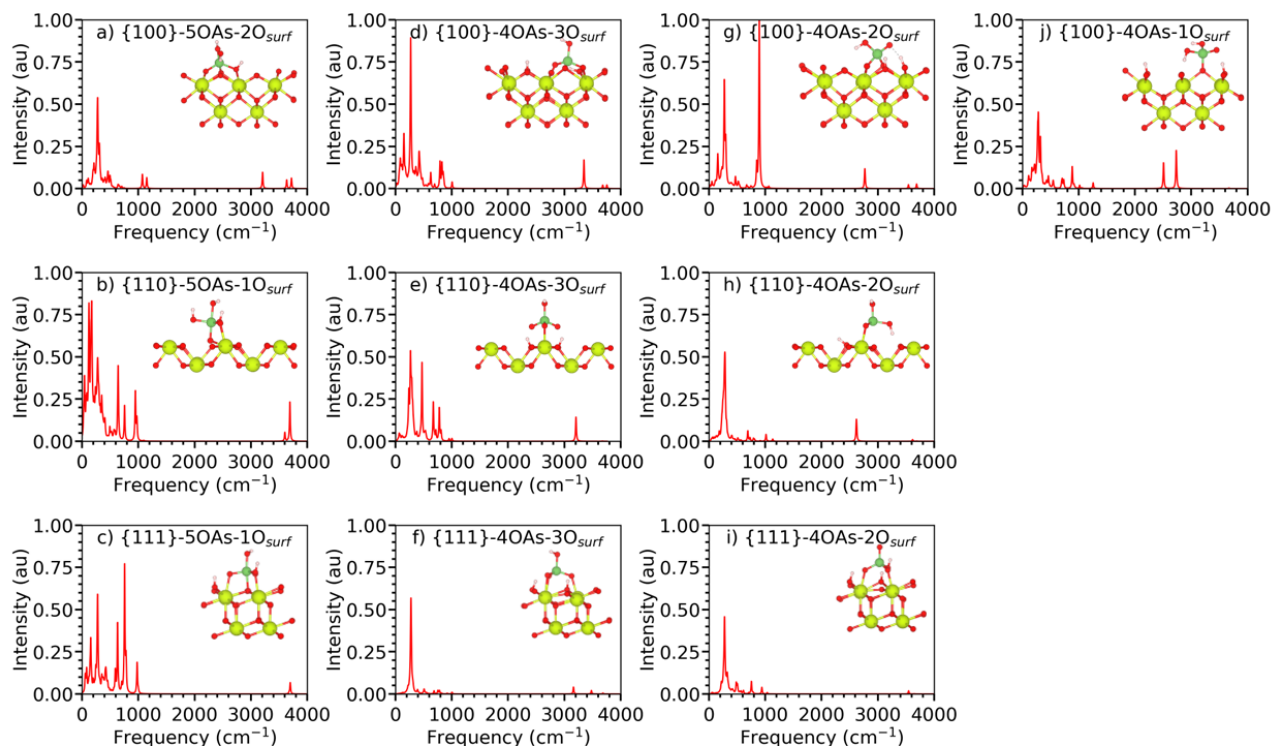

**Figure S3:** Simulated IR spectra of arsenate species adsorbed onto the  $\{111\}$ ,  $\{110\}$ , and  $\{100\}$  stoichiometric surfaces of  $\text{CeO}_2$ . The spectra are normalised relative to each other such that the highest absolute intensity across all the spectra is set to unity.

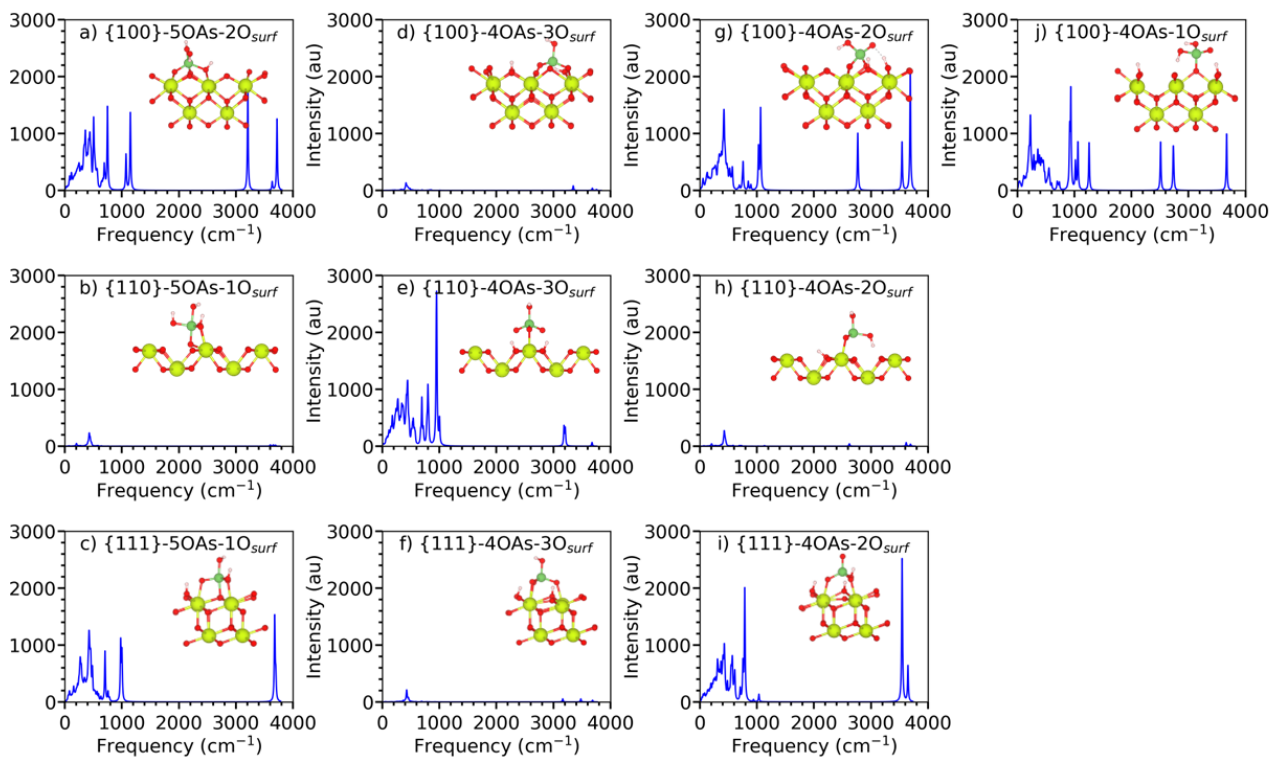

**Figure S4:** Simulated Raman spectra of raw data of arsenate species adsorbed onto the  $\{111\}$ ,  $\{110\}$ , and  $\{100\}$  stoichiometric surfaces of  $\text{CeO}_2$ .

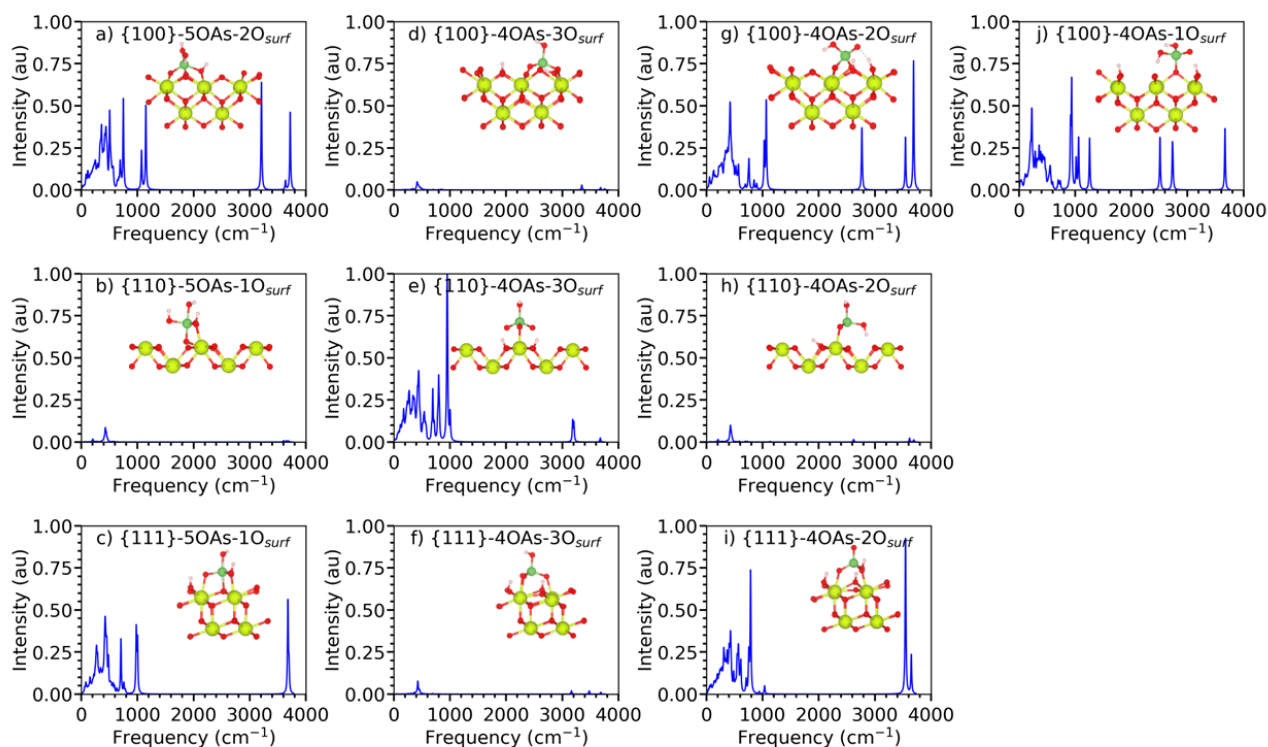

**Figure S5:** Simulated Raman spectra of arsenate species adsorbed onto the  $\{111\}$ ,  $\{110\}$ , and  $\{100\}$  stoichiometric surfaces of  $\text{CeO}_2$ . The spectra are normalised relative to each other such that the highest absolute intensity across all the spectra is set to unity.

**Table S4:** Assignment of the major features in the simulated IR spectra of arsenate species adsorbed onto the {111}, {110}, and {100} stoichiometric surfaces of CeO<sub>2</sub> with different binding modes. The mode labelling scheme is described in the text, and we additionally denote motion parallel or perpendicular to the surface where appropriate with the symbols || and ⊥ in parentheses. Vibrational frequencies from previous computational studies are also give for comparison.

|                                 | Frequency<br>(cm <sup>-1</sup> ) | IR Relative<br>intensity<br>(AU) | Raman<br>Relative<br>intensity<br>(AU)                                       | Mode                                                                                                                                      |
|---------------------------------|----------------------------------|----------------------------------|------------------------------------------------------------------------------|-------------------------------------------------------------------------------------------------------------------------------------------|
| H <sub>3</sub> AsO <sub>4</sub> | 95.12                            | 0.19                             |                                                                              | *Breathing modes                                                                                                                          |
|                                 | 133.85                           | 0.69                             |                                                                              | scAs-OH <sub>As</sub> , ρO <sub>As</sub> -H <sub>As</sub>                                                                                 |
|                                 | 214.76                           | 0.25                             |                                                                              | scAs-OH <sub>As</sub> , ρO <sub>As</sub> -H <sub>As</sub>                                                                                 |
|                                 | 278.25                           | 0.16                             |                                                                              | δAs-OH <sub>As</sub>                                                                                                                      |
|                                 | 280.38                           | 0.19                             | 0.13                                                                         | δAs-OH <sub>As</sub> , δAs-O <sub>As</sub> , ρO <sub>As</sub> -H <sub>As</sub>                                                            |
|                                 | 291.95                           | 0.39                             |                                                                              | δAs-OH <sub>As</sub> , δAs-O <sub>As</sub>                                                                                                |
|                                 | 317.36                           | 0.42                             | 0.08                                                                         | scAs-OH <sub>As</sub> , ρO <sub>As</sub> -H <sub>As</sub>                                                                                 |
|                                 | 656.29                           | 0.35                             | 0.15                                                                         | v <sub>s</sub> As-OH <sub>As</sub>                                                                                                        |
|                                 | 676.99                           | 0.87                             |                                                                              | v <sub>as</sub> As-OH <sub>As</sub>                                                                                                       |
|                                 | 694.96                           | 0.78                             |                                                                              | v <sub>s</sub> As-OH <sub>As</sub> , vAs-OH <sub>As</sub> (⊥)                                                                             |
|                                 | 952.21                           | 0.50                             | 0.10                                                                         | vAs=O <sub>As</sub> , ρO <sub>As</sub> -H <sub>As</sub>                                                                                   |
|                                 | 986.12                           | 0.39                             |                                                                              | ρO <sub>As</sub> -H <sub>As</sub>                                                                                                         |
|                                 | 990.26                           | 0.60                             |                                                                              | scAs-OH <sub>As</sub> , vAs=O <sub>As</sub>                                                                                               |
|                                 | 1031.67                          | 0.77                             |                                                                              | vAs=O <sub>As</sub> , δAs-OH <sub>As</sub>                                                                                                |
|                                 | 3683.79                          | 1.00                             | 0.68                                                                         | vO <sub>As</sub> -H <sub>As</sub> , ωAs-OH <sub>As</sub>                                                                                  |
|                                 | 3686.38                          | 0.29                             | 0.22                                                                         | vO <sub>As</sub> -H <sub>As</sub>                                                                                                         |
|                                 | 3699.49                          | 0.60                             | 1.00                                                                         | vO <sub>As</sub> -H <sub>As</sub>                                                                                                         |
| {111}-5OAs-1O <sub>surf</sub>   | 55.91                            | 0.09                             |                                                                              | *Breathing mode of surface and Arsenate                                                                                                   |
|                                 | 80.21                            | 0.08                             |                                                                              | *Breathing mode of surface and Arsenate                                                                                                   |
|                                 | 84.39                            | 0.06                             |                                                                              | *Breathing mode of surface and Arsenate                                                                                                   |
|                                 | 154.76                           | 0.28                             | 0.09                                                                         | *Breathing mode of surface and Arsenate                                                                                                   |
|                                 | 245.16                           | 0.10                             |                                                                              | *Breathing mode of surface                                                                                                                |
|                                 | 262.19                           |                                  | 0.07                                                                         | Complex v <sub>s</sub> Ce-O <sub>bulk</sub>                                                                                               |
|                                 | 269.00                           |                                  | 0.06                                                                         | Complex v <sub>s</sub> Ce-O <sub>bulk</sub> , v <sub>s</sub> Ce-O <sub>surf</sub>                                                         |
|                                 | 270.80                           |                                  | 0.12                                                                         | Complex v <sub>s</sub> Ce-O <sub>bulk</sub>                                                                                               |
|                                 | 272.15                           |                                  | 0.05                                                                         | Complex v <sub>s</sub> Ce-O <sub>bulk</sub>                                                                                               |
|                                 | 274.16                           | 0.21                             |                                                                              | Complex v <sub>s</sub> Ce-O <sub>bulk</sub> , v <sub>s</sub> Ce-O <sub>surf</sub>                                                         |
|                                 | 278.62                           | 0.16                             |                                                                              | Complex v <sub>s</sub> Ce-O <sub>bulk</sub> , v <sub>s</sub> Ce-O <sub>surf</sub>                                                         |
|                                 | 279.20                           | 0.18                             |                                                                              | v <sub>s</sub> Ce-O <sub>bulk</sub> (L)                                                                                                   |
|                                 | 289.88                           |                                  | 0.10                                                                         | Complex ωCe-O <sub>bulk</sub> , δAs-O <sub>As</sub> , ρO <sub>As</sub> -H <sub>As</sub>                                                   |
|                                 | 292.87                           |                                  | 0.07                                                                         | Complex v <sub>s</sub> Ce-O <sub>bulk</sub> , ρO <sub>As</sub> -H <sub>As</sub>                                                           |
|                                 | 343.47                           |                                  | 0.08                                                                         | ρCe-O <sub>bulk</sub> (L), v <sub>s</sub> Ce-O <sub>surf</sub> (T), δAs-O <sub>As</sub>                                                   |
|                                 | 349.65                           | 0.06                             |                                                                              | v <sub>s</sub> Ce-O <sub>bulk</sub> (L), v <sub>s</sub> Ce-O <sub>surf</sub> (T), δAs-O <sub>As</sub> , ρO <sub>As</sub> -H <sub>As</sub> |
|                                 | 363.73                           |                                  | 0.07                                                                         | v <sub>s</sub> Ce-O <sub>bulk</sub> (T), v <sub>s</sub> Ce-O <sub>surf</sub> (L)                                                          |
|                                 | 379.56                           |                                  | 0.05                                                                         | v <sub>s</sub> Ce-O <sub>bulk</sub> (L), v <sub>s</sub> Ce-O <sub>surf</sub> (L), ρAs-O <sub>As</sub>                                     |
|                                 | 410.60                           |                                  | 0.05                                                                         | v <sub>s</sub> Ce-O <sub>bulk</sub> (L), v <sub>s</sub> Ce-O <sub>surf</sub> (L), ρAs-O <sub>As</sub> , ρO <sub>As</sub> -H <sub>As</sub> |
|                                 | 413.23                           | 0.05                             |                                                                              | v <sub>s</sub> Ce-O <sub>bulk</sub> (T), v <sub>s</sub> Ce-O <sub>surf</sub> (T), δAs-O <sub>As</sub>                                     |
|                                 | 414.47                           |                                  | 0.05                                                                         | v <sub>s</sub> Ce-O <sub>bulk</sub> (T), v <sub>s</sub> Ce-O <sub>surf</sub> (T), δAs-O <sub>As</sub> , ρO <sub>As</sub> -H <sub>As</sub> |
|                                 | 419.17                           |                                  | 0.13                                                                         | v <sub>s</sub> Ce-O <sub>bulk</sub> (T), v <sub>s</sub> Ce-O <sub>surf</sub> (T), ρAs-O <sub>As</sub> , ρO <sub>As</sub> -H <sub>As</sub> |
|                                 | 422.50                           | 0.07                             | 0.13                                                                         | ρO <sub>As</sub> -H <sub>As</sub> , v <sub>s</sub> Ce-O <sub>bulk</sub> (T), v <sub>s</sub> Ce-O <sub>surf</sub> (T)                      |
|                                 | 426.75                           |                                  | 0.07                                                                         | v <sub>s</sub> Ce-O <sub>bulk</sub> (L), ρO <sub>As</sub> -H <sub>As</sub>                                                                |
|                                 | 427.42                           |                                  | 0.08                                                                         | v <sub>s</sub> Ce-O <sub>bulk</sub> (L), v <sub>s</sub> Ce-O <sub>surf</sub> (L)                                                          |
|                                 | 432.76                           |                                  | 0.14                                                                         | v <sub>s</sub> Ce-O <sub>bulk</sub> (T), v <sub>s</sub> Ce-O <sub>surf</sub> (L), ρO <sub>As</sub> -H <sub>As</sub>                       |
|                                 | 439.38                           |                                  | 0.05                                                                         | v <sub>as</sub> Ce-O <sub>bulk</sub> (T)                                                                                                  |
|                                 | 449.51                           |                                  | 0.10                                                                         | v <sub>as</sub> Ce-O <sub>bulk</sub> (L), v <sub>as</sub> Ce-O <sub>surf</sub> (L)                                                        |
|                                 | 449.92                           |                                  | 0.05                                                                         | v <sub>as</sub> Ce-O <sub>bulk</sub> (L), v <sub>as</sub> Ce-O <sub>surf</sub> (L)                                                        |
|                                 | 456.08                           |                                  | 0.08                                                                         | v <sub>as</sub> Ce-O <sub>surf</sub> (L), ρAs-O <sub>As</sub> , ρO <sub>As</sub> -H <sub>As</sub>                                         |
|                                 | 456.31                           |                                  | 0.17                                                                         | v <sub>as</sub> Ce-O <sub>surf</sub> (L), ρAs-O <sub>As</sub> , ρO <sub>As</sub> -H <sub>As</sub>                                         |
|                                 | 480.44                           |                                  | 0.07                                                                         | v <sub>as</sub> Ce-O <sub>surf</sub> (T), ωAs-O <sub>As</sub>                                                                             |
|                                 | 484.23                           |                                  | 0.09                                                                         | ρO <sub>surf</sub> -H <sub>surf</sub>                                                                                                     |
|                                 | 484.29                           |                                  | 0.16                                                                         | ρAs-O <sub>As</sub> , ρO <sub>surf</sub> -H <sub>surf</sub> , v <sub>s</sub> Ce-O <sub>surf</sub> (L), ρO <sub>As</sub> -H <sub>As</sub>  |
|                                 | 590.81                           | 0.13                             |                                                                              | v <sub>s</sub> As-OH <sub>As</sub>                                                                                                        |
|                                 | 631.36                           | 0.42                             |                                                                              | vAs-OH <sub>As</sub> (L)                                                                                                                  |
|                                 | 705.20                           |                                  | 0.15                                                                         | ρO <sub>surf</sub> -H <sub>surf</sub>                                                                                                     |
|                                 | 705.24                           |                                  | 0.41                                                                         | ρO <sub>surf</sub> -H <sub>surf</sub> , v <sub>s</sub> As-O <sub>As</sub>                                                                 |
|                                 | 756.59                           | 0.76                             |                                                                              | v <sub>s</sub> As-O <sub>As</sub>                                                                                                         |
|                                 | 758.11                           |                                  | 0.10                                                                         | v <sub>s</sub> As-O <sub>As</sub>                                                                                                         |
|                                 | 782.78                           | 0.19                             |                                                                              | v <sub>as</sub> As-O <sub>As</sub>                                                                                                        |
|                                 | 979.03                           | 0.18                             | 0.44                                                                         | vAs-OH <sub>As</sub> (L)                                                                                                                  |
| 980.74                          |                                  | 0.20                             | ρO <sub>As</sub> -H <sub>As</sub>                                            |                                                                                                                                           |
| 1000.59                         |                                  | 0.37                             | ρO <sub>As</sub> -H <sub>As</sub>                                            |                                                                                                                                           |
| 1003.55                         |                                  | 0.16                             | vAs-OH <sub>As</sub> (L), ρO <sub>As</sub> -H <sub>As</sub> (L)              |                                                                                                                                           |
| 3679.98                         |                                  | 0.35                             | vO <sub>As</sub> -H <sub>As</sub> , vO <sub>surf</sub> -H <sub>surf</sub>    |                                                                                                                                           |
| 3680.35                         |                                  | 0.42                             | vO <sub>As</sub> -H <sub>As</sub> , vO <sub>surf</sub> -H <sub>surf</sub>    |                                                                                                                                           |
| 3684.70                         |                                  | 0.08                             | vO <sub>As</sub> -H <sub>As</sub> (L), vO <sub>surf</sub> -H <sub>surf</sub> |                                                                                                                                           |
| 3685.01                         |                                  | 0.11                             | vO <sub>As</sub> -H <sub>As</sub> (L), vO <sub>surf</sub> -H <sub>surf</sub> |                                                                                                                                           |
| 3700.34                         | 0.07                             | 0.05                             | vO <sub>As</sub> -H <sub>As</sub>                                            |                                                                                                                                           |
| 3700.668                        |                                  | 0.19                             | vO <sub>As</sub> -H <sub>As</sub> , vO <sub>surf</sub> -H <sub>surf</sub>    |                                                                                                                                           |
| {110}-5OAs-1O <sub>surf</sub>   | 29.35                            | 0.12                             |                                                                              | *Breathing mode of surface and Arsenate                                                                                                   |

|         |      |      |                                                                                                                                                                                                                   |
|---------|------|------|-------------------------------------------------------------------------------------------------------------------------------------------------------------------------------------------------------------------|
| 44.29   | 0.32 |      | *Breathing mode of surface and Arsenate                                                                                                                                                                           |
| 71.07   | 0.07 |      | *Breathing mode of surface and Arsenate                                                                                                                                                                           |
| 72.32   | 0.08 |      | *Breathing mode of surface and Arsenate                                                                                                                                                                           |
| 84.16   | 0.14 |      | *Breathing mode of surface and Arsenate                                                                                                                                                                           |
| 95.30   | 0.05 |      | *Breathing mode of surface and Arsenate                                                                                                                                                                           |
| 117.39  | 0.13 |      | *Breathing mode of surface and Arsenate                                                                                                                                                                           |
| 121.79  | 0.26 |      | *Breathing mode of surface and Arsenate                                                                                                                                                                           |
| 124.86  | 0.22 |      | *Breathing mode of surface and Arsenate                                                                                                                                                                           |
| 126.05  | 0.08 |      | *Breathing mode of surface and Arsenate                                                                                                                                                                           |
| 127.57  | 0.07 |      | *Breathing mode of surface and Arsenate                                                                                                                                                                           |
| 151.66  | 0.20 |      | *Breathing mode of surface and Arsenate                                                                                                                                                                           |
| 160.39  | 0.34 |      | *Breathing mode of surface and Arsenate                                                                                                                                                                           |
| 168.99  | 0.06 |      | *Breathing mode of surface and Arsenate                                                                                                                                                                           |
| 172.69  | 0.45 |      | *Breathing mode of surface and Arsenate                                                                                                                                                                           |
| 173.60  | 0.11 |      | *Breathing mode of surface and Arsenate                                                                                                                                                                           |
| 195.53  | 0.07 |      | *Breathing mode of surface and Arsenate                                                                                                                                                                           |
| 218.13  | 0.06 |      | *Breathing mode of surface and Arsenate                                                                                                                                                                           |
| 237.07  | 0.13 |      | $v_s\text{Ce-O}_{\text{surf}}(\text{L}), v_s\text{Ce-O}_{\text{bulk}}(\text{L})$                                                                                                                                  |
| 256.75  | 0.06 |      | Complex $v_s\text{Ce-O}_{\text{surf}}, v_s\text{Ce-O}_{\text{bulk}}$                                                                                                                                              |
| 266.96  | 0.09 |      | $v_s\text{Ce-O}_{\text{bulk}}(\text{L}), p\text{Ce-O}_{\text{surf}}$                                                                                                                                              |
| 274.81  | 0.12 |      | $v_s\text{Ce-O}_{\text{bulk}}(\text{L})$                                                                                                                                                                          |
| 280.71  | 0.18 |      | $p\text{Ce-O}_{\text{bulk}}, p\text{Ce-O}_{\text{surf}}$                                                                                                                                                          |
| 287.03  | 0.09 |      | $v_s\text{Ce-O}_{\text{surf}}(\text{L}), v_s\text{Ce-O}_{\text{bulk}}(\text{L})$                                                                                                                                  |
| 294.74  | 0.06 |      | $v_s\text{Ce-O}_{\text{surf}}(\text{L}), v_s\text{Ce-O}_{\text{bulk}}(\text{L})$                                                                                                                                  |
| 300.024 | 0.06 |      | $p\text{Ce-O}_{\text{bulk}}, p\text{Ce-O}_{\text{surf}}$                                                                                                                                                          |
| 324.25  | 0.11 |      | $v_s\text{Ce-O}_{\text{surf}}(\text{T}), v_s\text{Ce-O}_{\text{bulk}}(\text{T}), \delta\text{As-OH}_{\text{As}}$                                                                                                  |
| 349.74  | 0.12 |      | $v_s\text{Ce-O}_{\text{surf}}(\text{T}), v_s\text{Ce-O}_{\text{bulk}}(\text{T}), \delta\text{As-OH}_{\text{As}}$                                                                                                  |
| 409.31  | 0.05 |      | $v_{\text{As}}\text{Ce-O}_{\text{surf}}(\text{T}), v_{\text{As}}\text{Ce-O}_{\text{bulk}}(\text{T}), p\text{O}_{\text{As-H}_{\text{As}}}(\perp), \delta\text{As-OH}_{\text{As}}, \delta\text{As-O}_{\text{surf}}$ |
| 426.87  |      | 0.06 | $v_s\text{Ce-O}_{\text{bulk}}(\text{L}), v_{\text{As}}\text{Ce-O}_{\text{surf}}(\text{T})$                                                                                                                        |
| 493.21  | 0.07 |      | $v_{\text{As}}\text{OH}_{\text{As}}\text{-As-O}_{\text{surf}}, v_{\text{As}}\text{As-(OH}_{\text{As}})_2$                                                                                                         |
| 634.93  | 0.13 |      | $v_{\text{As}}\text{OH}_{\text{As}}\text{-As-O}_{\text{surf}}(\perp), v_{\text{As}}\text{As-(O}_{\text{As}})_2$                                                                                                   |
| 642.01  | 0.36 |      | $v_{\text{As}}(\text{OH}_{\text{As}})_3\text{-As-O}_{\text{surf}}$                                                                                                                                                |
| 755.73  | 0.20 |      | $v\text{As-O}_{\text{As}}, v\text{As-O}_{\text{surf}}$                                                                                                                                                            |
| 947.82  | 0.29 |      | $v\text{As-OH}_{\text{As}}(\perp)$                                                                                                                                                                                |
| 975.11  | 0.12 |      | $\delta\text{As-OH}_{\text{As}}$                                                                                                                                                                                  |
| 3604.20 | 0.05 |      | $v\text{O}_{\text{As-H}_{\text{As}}}(\parallel)$                                                                                                                                                                  |
| 3694.10 | 0.23 |      | $v\text{O}_{\text{As-H}_{\text{As}}}$                                                                                                                                                                             |
| <hr/>   |      |      |                                                                                                                                                                                                                   |
| 85.39   |      | 0.06 | *Breathing mode of surface                                                                                                                                                                                        |
| 194.34  | 0.06 |      | $v_s\text{Ce-O}_{\text{surf}}(\text{L})$                                                                                                                                                                          |
| 212.11  | 0.10 |      | $v_s\text{Ce-O}_{\text{surf}}(\text{L}),$ breathing modes of arsenate                                                                                                                                             |
| 234.36  |      | 0.07 | $v_s\text{Ce-O}_{\text{bulk}}(\text{L})$                                                                                                                                                                          |
| 270.33  | 0.20 |      | $v_s\text{Ce-O}_{\text{bulk}}(\text{L})$                                                                                                                                                                          |
| 278.76  | 0.34 |      | $v_s\text{Ce-O}_{\text{bulk}}(\text{L})$                                                                                                                                                                          |
| 291.67  |      | 0.05 | $v_s\text{Ce-O}_{\text{bulk}}(\text{T}), \text{scAs-OH}_{\text{As}}$                                                                                                                                              |
| 309.84  | 0.18 |      | $v_s\text{Ce-O}_{\text{surf}}(\text{L}), v_s\text{Ce-O}_{\text{bulk}}(\text{T})$                                                                                                                                  |
| 329.19  |      | 0.05 | $p\text{Ce-O}_{\text{bulk}}$                                                                                                                                                                                      |
| 330.05  |      | 0.08 | $v_s\text{Ce-O}(\text{T}), \delta\text{As-O}_{\text{As}}, \text{scAs-OH}_{\text{As}}$                                                                                                                             |
| 337.97  |      | 0.08 | $p\text{Ce-O}_{\text{bulk}}, p\text{O}_{\text{surf-H}_{\text{surf}}}$                                                                                                                                             |
| 339.66  |      | 0.05 | $p\text{Ce-O}_{\text{bulk}}, \text{scAs-OH}_{\text{As}}$                                                                                                                                                          |
| 350.87  |      | 0.05 | Complex $p\text{Ce-O}$                                                                                                                                                                                            |
| 358.03  |      | 0.07 | $p\text{Ce-O}_{\text{bulk}}$                                                                                                                                                                                      |
| 360.42  |      | 0.15 | $p\text{Ce-O}_{\text{bulk}}, p\text{O}_{\text{surf-H}_{\text{surf}}}$                                                                                                                                             |
| 364.54  |      | 0.08 | $v_s\text{Ce-O}_{\text{surf}}(\text{T}), v_s\text{Ce-O}_{\text{bulk}}(\text{L})$                                                                                                                                  |
| 367.38  |      | 0.05 | $v_{\text{As}}\text{Ce-O}_{\text{bulk}}(\text{L})$                                                                                                                                                                |
| 386.75  |      | 0.10 | $v_{\text{As}}\text{Ce-O}_{\text{bulk}}(\text{T}), v_{\text{As}}\text{As-O}_{\text{surf}}, p\text{O}_{\text{surf-H}_{\text{surf}}}, \delta\text{As-O}_{\text{As}}$                                                |
| 397.14  |      | 0.06 | $v_s\text{Ce-O}_{\text{surf}}(\text{T}), v_s\text{Ce-O}_{\text{bulk}}(\text{T}), v_{\text{As}}\text{As-O}_{\text{surf}}, \delta\text{As-O}_{\text{As}}, \text{scAs-OH}_{\text{As}}$                               |
| 416.69  |      | 0.08 | $v_{\text{As}}\text{Ce-O}_{\text{bulk}}(\text{T}), p\text{O}_{\text{surf-H}_{\text{surf}}}$                                                                                                                       |
| 420.87  |      | 0.11 | $v_{\text{As}}\text{Ce-O}_{\text{bulk}}(\text{T}), \text{scO}_{\text{As}}\text{-As-O}_{\text{surf}}, p\text{O}_{\text{surf-H}_{\text{surf}}}$                                                                     |
| 431.30  |      | 0.14 | $v_s\text{Ce-O}_{\text{surf}}(\text{T}), v_s\text{Ce-O}_{\text{bulk}}(\text{T}), p\text{O}_{\text{surf-H}_{\text{surf}}}$                                                                                         |
| 439.86  |      | 0.14 | $v_{\text{As}}\text{Ce-O}_{\text{bulk}}(\text{L})$                                                                                                                                                                |
| 442.49  |      | 0.09 | Complex $v\text{Ce-O}, t\text{O}_{\text{As}}\text{-As}$                                                                                                                                                           |
| 451.68  |      | 0.06 | $v_{\text{As}}\text{Ce-O}_{\text{bulk}}(\text{L})$                                                                                                                                                                |
| 458.62  |      | 0.08 | $v_{\text{As}}\text{Ce-O}_{\text{bulk}}(\text{L}), v_{\text{As}}\text{Ce-O}_{\text{surf}}(\text{T}), v_{\text{As}}\text{As-O}_{\text{surf}}$                                                                      |
| 462.11  |      | 0.07 | $v_{\text{As}}\text{Ce-O}_{\text{bulk}}(\text{L}), v_{\text{As}}\text{Ce-O}_{\text{surf}}(\text{L}), p\text{O}_{\text{surf-H}_{\text{surf}}}$                                                                     |
| 463.68  | 0.05 |      | $v_{\text{As}}\text{Ce-O}_{\text{surf}}(\text{T}), \delta\text{As-O}_{\text{surf}}, \delta\text{As-O}_{\text{As}}$                                                                                                |
| 495.86  | 0.06 |      | $v_{\text{As}}\text{Ce-O}_{\text{surf}}(\text{T}), v_{\text{As}}\text{As-O}_{\text{surf}}, v_{\text{As}}\text{As-O}_{\text{As}}, p\text{O}_{\text{As-H}_{\text{As}}}, p\text{O}_{\text{surf-H}_{\text{surf}}}$    |
| 504.34  |      | 0.11 | $v_{\text{As}}\text{Ce-O}(\text{T}), p\text{O}_{\text{As-H}_{\text{As}}}$                                                                                                                                         |
| 504.84  |      | 0.44 | $v_{\text{As}}\text{As-O}_{\text{As}}, p\text{O}_{\text{As-H}_{\text{As}}}$                                                                                                                                       |
| 505.59  |      | 0.09 | $v_{\text{As}}\text{Ce-O}_{\text{bulk}}(\text{T}), p\text{O}_{\text{As-H}_{\text{As}}}$                                                                                                                           |
| 516.36  |      | 0.06 | $t\text{O}_{\text{As}}\text{-As}, v_{\text{As}}\text{As-O}_{\text{surf}}, p\text{O}_{\text{As-H}_{\text{As}}}$                                                                                                    |
| 567.42  |      | 0.06 | $v_s\text{Ce-O}_{\text{bulk}}(\text{L}), \omega\text{As-O}_{\text{As}}$                                                                                                                                           |
| 668.04  |      | 0.05 | $v_{\text{As}}\text{As-O}_{\text{As}}, v_{\text{As}}\text{As-OH}_{\text{As}}$                                                                                                                                     |
| 691.39  |      | 0.16 | $v_{\text{As}}\text{As-O}_{\text{As}}, p\text{O}_{\text{surf-H}_{\text{surf}}}, p\text{O}_{\text{As-H}_{\text{As}}}$                                                                                              |
| 691.40  |      | 0.09 | $v_{\text{As}}\text{As-O}_{\text{As}}, p\text{O}_{\text{surf-H}_{\text{surf}}}, p\text{O}_{\text{As-H}_{\text{As}}}$                                                                                              |
| 705.52  |      | 0.06 | $v_{\text{As}}\text{OH}_{\text{As}}\text{-As-O}_{\text{As}}, v_{\text{As}}\text{As-O}_{\text{As}}$                                                                                                                |
| 748.099 |      | 0.43 | $p\text{O}_{\text{As-H}_{\text{As}}}, p\text{O}_{\text{surf-H}_{\text{surf}}}$                                                                                                                                    |
| 748.10  |      | 0.49 | $p\text{O}_{\text{As-H}_{\text{As}}}, p\text{O}_{\text{surf-H}_{\text{surf}}}$                                                                                                                                    |
| 1072.06 | 0.08 | 0.24 | $\delta\text{O}_{\text{As}}\text{-As-O}_{\text{As}}, p\text{O}_{\text{As-H}_{\text{As}}}$                                                                                                                         |

{100}-5OAs-2O<sub>surf</sub>

|  |         |      |                                                                                                                   |
|--|---------|------|-------------------------------------------------------------------------------------------------------------------|
|  | 1075.61 | 0.17 | $pO_{As-H_{As}}$                                                                                                  |
|  | 1149.56 | 0.06 | $v_{As}O_{As-O_{As}}, \delta O_{As-As-O_{As}}, pO_{As-H_{As}}$                                                    |
|  | 3208.45 | 0.08 | $vO_{As-H_{As}}$                                                                                                  |
|  | 3209.6  |      | $vO_{As-H_{As}}$                                                                                                  |
|  | 3637.37 | 0.05 | $vO_{As-H_{As}}$                                                                                                  |
|  | 3637.92 |      | $vO_{As-H_{As}}$                                                                                                  |
|  | 3721.69 | 0.06 | $vO_{surf-H_{surf}}$                                                                                              |
|  | 3722.22 |      | $vO_{surf-H_{surf}}$                                                                                              |
|  | 38.32   | 0.05 | *Breathing mode of surface                                                                                        |
|  | 166.99  | 0.08 | *Breathing mode of surface and arsenate                                                                           |
|  | 182.33  |      | *Breathing mode of surface and arsenate                                                                           |
|  | 192.53  | 0.07 | *Breathing mode of surface and arsenate                                                                           |
|  | 201.18  |      | *Breathing mode of surface                                                                                        |
|  | 217.52  | 0.06 | $pCe-O$                                                                                                           |
|  | 222.22  |      | *Breathing mode of surface                                                                                        |
|  | 228.79  | 0.44 | $v_sCe-O_{bulk} (L), \delta As-O_{As}, pO_{As-H_{As}}$                                                            |
|  | 253.52  | 0.05 | $v_sCe-O_{bulk} (L)$                                                                                              |
|  | 271.85  | 0.11 | $v_sCe-O_{bulk} (L), v_sCe-O_{surf} (T)$                                                                          |
|  | 272.25  | 0.11 | $v_sCe-O_{bulk} (L), v_sCe-O_{surf} (T)$                                                                          |
|  | 277.93  | 0.09 | $pCe-O, \delta As-OH_{As}, pO_{As-H_{As}}, tAs-O_{As}$                                                            |
|  | 283.53  | 0.16 | $v_sCe-O_{surf} (T), pO_{As-H_{As}}$                                                                              |
|  | 284.58  | 0.15 | $v_sCe-O_{surf} (T), pO_{As-H_{As}}$                                                                              |
|  | 287.71  | 0.14 | $v_sCe-O_{surf} (T), pO_{As-H_{As}}$                                                                              |
|  | 319.64  | 0.19 | $v_sCe-O_{surf} (T), \delta As-O_{As}$                                                                            |
|  | 320.88  | 0.05 | $v_sCe-O_{bulk} (T), \delta As-O_{As}$                                                                            |
|  | 353.17  | 0.06 | $\omega As-O_{As}, v_sCe-O_{surf} (T), pCe-O_{bulk}$                                                              |
|  | 358.78  | 0.06 | $pCe-O_{bulk}$                                                                                                    |
|  | 360.74  | 0.08 | $v_{As}Ce-O_{bulk} (T), \delta As-O_{As}$                                                                         |
|  | 389.38  | 0.08 | $\omega Ce-O_{bulk} (T), \delta As-O_{As}$                                                                        |
|  | 415.54  | 0.06 | Complex $vCe-O$                                                                                                   |
|  | 419.80  | 0.11 | $v_sCe-O$                                                                                                         |
|  | 430.46  | 0.08 | $pCe-O_{bulk}$                                                                                                    |
|  | 445.61  | 0.05 | Complex $vCe-O, \delta As-O_{As}$                                                                                 |
|  | 455.74  | 0.06 | $v_{As}Ce-O_{bulk} (L)$                                                                                           |
|  | 480.94  | 0.05 | $v_{As}Ce-O_{surf} (L)$                                                                                           |
|  | 554.49  | 0.10 | $v_sCe-O (T)$                                                                                                     |
|  | 734.76  | 0.06 | $vAs-OH_{As} (  ), vAs-O_{As}$                                                                                    |
|  | 885.39  | 0.12 | $vAs-O_{As} (  ), pO_{As-H_{As}}, pO_{surf-H_{surf}}$                                                             |
|  | 916.367 | 0.52 | $pO_{As-H_{As}}, pO_{surf-H_{surf}}$                                                                              |
|  | 916.371 | 0.08 | $pO_{As-H_{As}}, pO_{surf-H_{surf}}$                                                                              |
|  | 936.37  | 0.05 | $pO_{As-H_{As}}, pO_{surf-H_{surf}}$                                                                              |
|  | 936.73  | 0.67 | $pO_{As-H_{As}}, pO_{surf-H_{surf}}$                                                                              |
|  | 1016.3  | 0.14 | $v_{As}O_{As-As-OH_{As}}, \delta As-O_{As}, pO_{As-H_{As}}$                                                       |
|  | 1016.8  | 0.17 | $v_{As}O_{As-As-OH_{As}}, \delta As-O_{As}, pO_{As-H_{As}}$                                                       |
|  | 1060.33 | 0.29 | $pO_{surf-H_{surf}}$                                                                                              |
|  | 1060.43 | 0.23 | $pO_{surf-H_{surf}}$                                                                                              |
|  | 1256.54 | 0.07 | $pO_{As-H_{As}} (  )$                                                                                             |
|  | 1257.17 | 0.45 | $pO_{As-H_{As}} (  )$                                                                                             |
|  | 2507.26 | 0.12 | $vO_{surf-H_{surf}}$                                                                                              |
|  | 2511.76 | 0.52 | $vO_{surf-H_{surf}}$                                                                                              |
|  | 2732.62 | 0.21 | $vO_{As-H_{As}}$                                                                                                  |
|  | 2740.83 | 0.19 | $vO_{As-H_{As}}$                                                                                                  |
|  | 3669.80 | 0.08 | $vO_{As-H_{As}}$                                                                                                  |
|  | 3669.87 | 0.54 | $vO_{As-H_{As}}$                                                                                                  |
|  | 172.91  | 0.05 | Complex breathing mode of surface                                                                                 |
|  | 238.51  | 0.05 | Complex $vCe-O_{bulk}, vCe-O_{surf}$                                                                              |
|  | 258.61  | 0.06 | Complex $vCe-O_{bulk}, vCe-O_{surf}$                                                                              |
|  | 265.27  | 0.06 | $v_{As}Ce-O_{bulk} (T), v_{As}Ce-O_{surf} (T)$                                                                    |
|  | 273.15  | 0.05 | Complex $v_{As}Ce-O_{bulk} (T), v_{As}Ce-O_{surf} (T)$                                                            |
|  | 276.06  | 0.21 | $v_sCe-O_{bulk} (L), v_sCe-O_{surf} (L)$                                                                          |
|  | 276.46  | 0.06 | $v_sCe-O_{bulk} (L), v_sCe-O_{surf} (L)$                                                                          |
|  | 280.47  | 0.12 | $v_sCe-O_{bulk} (L)$                                                                                              |
|  | 286.92  | 0.06 | $v_sCe-O_{bulk} (T), v_sCe-O_{surf} (T)$                                                                          |
|  | 306.20  | 0.08 | $v_{As}Ce-O_{bulk} (T), v_{As}Ce-O_{surf} (T), \omega As-O_{As}$                                                  |
|  | 308.08  | 0.05 | Complex $vCe-O, pO_{As-H_{As}}$                                                                                   |
|  | 309.20  | 0.10 | $v_{As}Ce-O_{bulk} (T), v_{As}Ce-O_{surf} (T), pO_{As-H_{As}}$                                                    |
|  | 319.12  | 0.06 | $\omega As-O_{As}, v_{As}Ce-O_{bulk} (T), v_{As}Ce-O_{surf} (T), pO_{surf-H_{surf}}$                              |
|  | 319.69  | 0.06 | Complex $vCe-O$                                                                                                   |
|  | 339.58  | 0.05 | $v_{As}Ce-O_{bulk} (L), v_{As}Ce-O_{surf} (L), pO_{surf-H_{surf}}, pO_{As-H_{As}}$                                |
|  | 340.11  | 0.07 | Complex $vCe-O, pO_{As-H_{As}}$                                                                                   |
|  | 357.79  | 0.07 | $v_{As}Ce-O_{bulk} (T), v_{As}Ce-O_{surf} (T)$                                                                    |
|  | 367.24  | 0.16 | $v_{As}Ce-O_{surf} (T), pO_{surf-H_{surf}}, pO_{As-H_{As}}, scAs-O_{As}$                                          |
|  | 370.13  | 0.07 | $v_{As}Ce-O_{surf} (T), scOH_{As-As-O_{As}}, pO_{surf-H_{surf}}, pO_{As-H_{As}}$                                  |
|  | 396.92  | 0.06 | $v_{As}Ce-O_{surf} (T), pO_{As-H_{As}}$                                                                           |
|  | 401.76  | 0.07 | $v_sCe-O_{surf} (T), pO_{surf-O_{surf}}, v_sCe-O_{bulk} (T), scOH_{As-As-O_{As}}, pO_{As-H_{As}}$                 |
|  | 404.53  | 0.06 | $v_sCe-O_{surf} (T), pO_{As-H_{As}}, v_sCe-O_{bulk} (T), scOH_{As-As-O_{As}}, pO_{As-H_{As}}, pO_{surf-H_{surf}}$ |
|  | 406.31  | 0.07 | $v_sCe-O_{surf} (T), pO_{As-H_{As}}, v_sCe-O_{bulk} (T), scOH_{As-As-O_{As}}, pO_{As-H_{As}}, pO_{surf-H_{surf}}$ |
|  | 409.09  | 0.07 | $v_sCe-O_{surf} (L), pO_{As-H_{As}}, v_sCe-O_{bulk} (L)$                                                          |

{100}-4OAs-1O<sub>surf</sub>

{111}-4OAs-2O<sub>surf</sub>

|                                     |                                     |                                                               |                                                                                                  |                                         |
|-------------------------------------|-------------------------------------|---------------------------------------------------------------|--------------------------------------------------------------------------------------------------|-----------------------------------------|
|                                     | 425.08                              | 0.05                                                          | $V_{As}Ce-O_{surf}(L), V_{As}Ce-O_{bulk}(L), \omega_{As}-O_{As}, pO_{surf}-H_{surf}$             |                                         |
|                                     | 426.81                              | 0.07                                                          | $V_{As}Ce-O_{surf}(L), V_{As}Ce-O_{bulk}(L),$                                                    |                                         |
|                                     | 427.58                              | 0.24                                                          | $V_sCe-O_{surf}(T), V_sCe-O_{bulk}(T), \delta_{As}-OH_{As}$                                      |                                         |
|                                     | 431.13                              | 0.07                                                          | $V_sCe-O_{surf}(T), V_sCe-O_{bulk}(T), \delta O_{As}-H_{As}$                                     |                                         |
|                                     | 479.01                              | 0.06                                                          | $V_{As}Ce-O_{surf}(L), V_{As}Ce-O_{bulk}(L)$                                                     |                                         |
|                                     | 484.40                              | 0.06                                                          | $v_sCe-O_{surf}(T), v_sCe-O_{bulk}(T), v_{As}-OH_{As}, pO_{As}-H_{As}, pO_{surf}-H_{surf}$       |                                         |
|                                     | 486.17                              | 0.05                                                          | $v_sCe-O_{surf}(T), p_{As}-OH_{As}, pO_{surf}-H_{surf}$                                          |                                         |
|                                     | 542.82                              | 0.17                                                          | $v_{As}Ce-O_{surf}(T), sc_{As}-O_{As}, pO_{As}-H_{As}, pO_{surf}-H_{surf}$                       |                                         |
|                                     | 550.7                               | 0.14                                                          | $pCe-O_{bulk}, sc_{As}-O_{As}, pO_{As}-H_{As}, pO_{surf}-H_{surf}$                               |                                         |
|                                     | 560.78                              | 0.10                                                          | $v_sCe-O_{surf}(T), v_sCe-O_{bulk}(T), v_sAs-O_{As}, pO_{As}-H_{As}, pO_{surf}-H_{surf}$         |                                         |
|                                     | 568.64                              | 0.19                                                          | $v_sCe-O_{surf}(T), v_sCe-O_{bulk}(T), \omega_{As}-O_{As}, pO_{As}-H_{As}, pO_{surf}-H_{surf}$   |                                         |
|                                     | 571.64                              | 0.15                                                          | $v_sCe-O_{surf}(T), v_sCe-O_{bulk}(T), \omega_{As}-O_{As}, pO_{As}-H_{As}, pO_{surf}-H_{surf}$   |                                         |
|                                     | 597.51                              | 0.05                                                          | $v_sCe-O_{surf}(T), pO_{As}-H_{As}, pO_{surf}-H_{surf}$                                          |                                         |
|                                     | 612.13                              | 0.20                                                          | $v_sCe-O_{surf}(T), pO_{As}-H_{As}, pO_{surf}-H_{surf}$                                          |                                         |
|                                     | 612.66                              | 0.09                                                          | $pO_{As}-H_{As}, pO_{surf}-H_{surf}$                                                             |                                         |
|                                     | 706.95                              | 0.10                                                          | $v_sAs-O_{As}, pO_{As}-H_{As}, pO_{surf}-H_{surf}$                                               |                                         |
|                                     | 753.24                              | 0.14                                                          | $v_sAs-O_{As}, pO_{surf}-H_{surf}, pO_{As}-H_{As}$                                               |                                         |
|                                     | 754.28                              | 0.06                                                          | $v_sAs-O_{As}, pO_{surf}-H_{surf}, pO_{As}-H_{As}$                                               |                                         |
|                                     | 758.13                              | 0.06                                                          | $v_sAs-O_{As}, v_{As}-OH_{As}(  ), pO_{surf}-H_{surf}, pO_{As}-H_{As}$                           |                                         |
|                                     | 785.91                              | 0.70                                                          | $v_sAs-O_{As}, pO_{surf}-H_{surf}, pO_{As}-H_{As}$                                               |                                         |
|                                     | 786.45                              | 0.53                                                          | $v_sAs-O_{As}, pO_{surf}-H_{surf}, pO_{As}-H_{As}$                                               |                                         |
|                                     | 1034.92                             | 0.07                                                          | $pO_{As}-H_{As}, v_{As}-OH_{As}(L)$                                                              |                                         |
|                                     | 3544.46                             | 0.63                                                          | $vO_{As}-H_{As}$                                                                                 |                                         |
|                                     | 3545.00                             | 0.38                                                          | $vO_{surf}-H_{surf}, vO_{As}-H_{As}$                                                             |                                         |
|                                     | 3548.50                             | 0.02                                                          | $vO_{As}-H_{As}, vO_{surf}-H_{surf}$                                                             |                                         |
|                                     | 3549.39                             | 0.50                                                          | $vO_{surf}-H_{surf}, vO_{As}-H_{As}$                                                             |                                         |
|                                     | 3549.49                             | 0.19                                                          | $vO_{surf}-H_{surf}$                                                                             |                                         |
|                                     | 3650.00                             | 0.20                                                          | $vO_{As}-H_{As}$                                                                                 |                                         |
| <b>{110}-4OAs-2O<sub>surf</sub></b> | 228.72                              | 0.07                                                          | *Breathing mode of surface                                                                       |                                         |
|                                     | 246.12                              | 0.08                                                          | $v_sCe-O_{surf}(L)$                                                                              |                                         |
|                                     | 258.76                              | 0.08                                                          | $v_sCe-O_{bulk}(L), v_{As}Ce-O_{surf}(T)$                                                        |                                         |
|                                     | 271.10                              | 0.05                                                          | $v_sCe-O_{bulk}(L), pCe-O_{surf}$                                                                |                                         |
|                                     | 271.52                              | 0.07                                                          | $v_sCe-O_{bulk}(L), pCe-O_{surf}$                                                                |                                         |
|                                     | 279.87                              | 0.22                                                          | $pCe-O_{surf}$                                                                                   |                                         |
|                                     | 287.42                              | 0.20                                                          | $v_sCe-O_{bulk}(L), pCe-O_{surf}, t_{As}-O_{As}, pO_{As}-H_{As}$                                 |                                         |
|                                     | 288.16                              | 0.06                                                          | $pCe-O_{bulk}, pCe-O_{surf}$                                                                     |                                         |
|                                     | 426.67                              | 0.06                                                          | $v_{As}Ce-O_{bulk}(L)$                                                                           |                                         |
|                                     | 690.32                              | 0.06                                                          | $v_{As}-OH_{As}(L), v_sAs-O_{As}$                                                                |                                         |
|                                     | 2618.69                             | 0.08                                                          | $vO_{As}-H_{As}(  )$                                                                             |                                         |
|                                     | 2623.41                             | 0.06                                                          | $vO_{As}-H_{As}(  )$                                                                             |                                         |
|                                     | <b>{100}-4OAs-2O<sub>surf</sub></b> | 51.37                                                         | 0.05                                                                                             | *Breathing mode of surface and arsenate |
|                                     |                                     | 56.09                                                         | 0.05                                                                                             | *Breathing mode of surface and arsenate |
| 157.03                              |                                     | 0.15                                                          | *Breathing mode of surface and arsenate                                                          |                                         |
| 270.89                              |                                     | 0.08                                                          | $v_sCe-O_{bulk}(L), v_sCe-O_{surf}(T), \delta_{As}-O_{As}$                                       |                                         |
| 272.05                              |                                     | 0.06                                                          | $v_sCe-O_{bulk}(L), v_sCe-O_{surf}(T)$                                                           |                                         |
| 273.71                              |                                     | 0.20                                                          | $v_sCe-O_{bulk}(L), v_{As}Ce-O_{surf}(T)$                                                        |                                         |
| 276.47                              |                                     | 0.20                                                          | $v_sCe-O_{bulk}(L)$                                                                              |                                         |
| 288.14                              |                                     | 0.05                                                          | Complex $vCe-O, sc_{As}-O_{As}, scO_{As}-As-OH_{As}$                                             |                                         |
| 297.88                              |                                     | 0.20                                                          | $v_sCe-O_{surf}(L)$                                                                              |                                         |
| 316.32                              |                                     | 0.06                                                          | $v_sCe-O_{surf}(L), sc_{As}-O_{As}$                                                              |                                         |
| 338.03                              |                                     | 0.06                                                          | $v_{As}Ce-O_{bulk}(T), v_{As}Ce-O_{surf}(T), \delta_{As}-O_{As}$                                 |                                         |
| 382.99                              |                                     | 0.08                                                          | $v_{As}Ce-O_{bulk}(T), v_{As}Ce-O_{surf}(T), sc_{As}-O_{As}, pO_{As}-H_{As}, pO_{surf}-H_{surf}$ |                                         |
| 395.57                              |                                     | 0.08                                                          | $v_{As}Ce-O_{bulk}(T), v_{As}Ce-O_{surf}(T), sc_{As}-O_{As}, pO_{As}-H_{As}, pO_{surf}-H_{surf}$ |                                         |
| 400.60                              |                                     | 0.12                                                          | $v_{As}Ce-O_{surf}(L), p_{As}-O_{As}, pO_{As}-H_{As}, pO_{surf}-H_{surf}$                        |                                         |
| 414.63                              |                                     | 0.05                                                          | $v_sCe-O_{surf}(T), v_sCe-O_{bulk}(T), pO_{As}-H_{As}, pO_{surf}-H_{surf}$                       |                                         |
| 414.88                              |                                     | 0.13                                                          | $v_sCe-O_{surf}(T), v_sCe-O_{bulk}(T), pO_{As}-H_{As}, pO_{surf}-H_{surf}$                       |                                         |
| 416.07                              |                                     | 0.07                                                          | $v_sCe-O_{surf}(T), v_sCe-O_{bulk}(T), sc_{As}-O_{As}, pO_{As}-H_{As}, pO_{surf}-H_{surf}$       |                                         |
| 420.86                              |                                     | 0.23                                                          | $v_sCe-O_{surf}(T), v_sCe-O_{bulk}(T), sc_{As}-O_{As}, pO_{As}-H_{As}, pO_{surf}-H_{surf}$       |                                         |
| 424.38                              |                                     | 0.18                                                          | $v_{As}Ce-O_{surf}(T), v_sCe-O_{bulk}(T), pO_{As}-H_{As}$                                        |                                         |
| 427.06                              |                                     | 0.16                                                          | $v_{As}Ce-O_{surf}(T), v_sCe-O_{bulk}(T), pO_{As}-H_{As}, pO_{surf}-H_{surf}$                    |                                         |
| 439.15                              |                                     | 0.07                                                          | $v_{As}Ce-O_{bulk}(L)$                                                                           |                                         |
| 448.10                              |                                     | 0.09                                                          | $v_{As}Ce-O_{bulk}(L)$                                                                           |                                         |
| 470.36                              |                                     | 0.06                                                          | $v_sCe-O_{surf}(T), pO_{As}-H_{As}$                                                              |                                         |
| 474.74                              |                                     | 0.05                                                          | $v_sCe-O_{surf}(T), pO_{As}-H_{As}$                                                              |                                         |
| 476.39                              |                                     | 0.06                                                          | $v_sCe-O_{surf}(T), pO_{As}-H_{As}$                                                              |                                         |
| 489.76                              |                                     | 0.11                                                          | $v_sCe-O_{surf}(T), scO_{As}-As-OH_{As}$                                                         |                                         |
| 522.07                              |                                     | 0.05                                                          | $pCe-O_{surf}(T), pCe-O_{bulk}(T)$                                                               |                                         |
| 523.76                              |                                     | 0.07                                                          | $v_sCe-O_{surf}(T), v_{As}O_{As}-H_{As}$                                                         |                                         |
| 569.45                              |                                     | 0.10                                                          | $v_sCe-O_{surf}(T), v_sCe-O_{bulk}(T)$                                                           |                                         |
| 571.30                              |                                     | 0.06                                                          | $v_sCe-O_{surf}(T), v_sCe-O_{bulk}(T)$                                                           |                                         |
| 757.46                              |                                     | 0.09                                                          | $pO_{surf}-H_{surf}, v_{As}As-O_{As}$                                                            |                                         |
| 757.47                              |                                     | 0.20                                                          | $pO_{surf}-H_{surf}, v_{As}As-O_{As}$                                                            |                                         |
| 847.81                              | 0.06                                | $v_sAs-O_{As}, pO_{surf}-H_{surf}$                            |                                                                                                  |                                         |
| 848.06                              | 0.13                                | $v_sAs-O_{As}(  ), pO_{surf}-H_{surf}$                        |                                                                                                  |                                         |
| 894.25                              | 1.00                                | $v_{As}As-O_{As}, pO_{surf}-H_{surf}$                         |                                                                                                  |                                         |
| 1028.39                             | 0.18                                | $v_sAs-O_{As}, pO_{As}-H_{As}, pO_{surf}-H_{surf}$            |                                                                                                  |                                         |
| 1028.49                             | 0.28                                | $v_sAs-O_{As}, pO_{As}-H_{As}, pO_{surf}-H_{surf}$            |                                                                                                  |                                         |
| 1063.63                             | 0.35                                | $\delta O_{As}-As-O_{As}, pO_{As}-H_{As}, pO_{surf}-H_{surf}$ |                                                                                                  |                                         |



|                                     |         |  |      |                                                                                                                                        |                                |
|-------------------------------------|---------|--|------|----------------------------------------------------------------------------------------------------------------------------------------|--------------------------------|
|                                     | 1065.01 |  | 0.55 | $\delta\text{As-OH}_{\text{As}}, \rho\text{O}_{\text{As-H}_{\text{As}}}, \rho\text{O}_{\text{surf-H}_{\text{surf}}}$                   |                                |
|                                     | 2767.42 |  | 0.07 | $v\text{O}_{\text{surf-H}_{\text{surf}}}$                                                                                              |                                |
|                                     | 2771.93 |  | 0.06 | $v\text{O}_{\text{surf-H}_{\text{surf}}}$                                                                                              |                                |
|                                     | 3545.13 |  | 0.37 | $v\text{O}_{\text{As-H}_{\text{As}}}, v\text{O}_{\text{surf-H}_{\text{surf}}}$                                                         |                                |
|                                     | 3545.16 |  | 0.16 | $v\text{O}_{\text{As-H}_{\text{As}}}, v\text{O}_{\text{surf-H}_{\text{surf}}}$                                                         |                                |
|                                     | 3690.00 |  | 0.71 | $v\text{O}_{\text{surf-H}_{\text{surf}}}$                                                                                              |                                |
|                                     | 3690.82 |  | 0.60 | $v\text{O}_{\text{surf-H}_{\text{surf}}}$                                                                                              |                                |
| <b>{111}-4OAs-3O<sub>surf</sub></b> | 268.26  |  | 0.07 | $v_s\text{Ce-O}_{\text{bulk}}(\text{L}), v_s\text{Ce-O}_{\text{surf}}(\text{L})$                                                       |                                |
|                                     | 272.75  |  | 0.15 | $\delta\text{As-O}_{\text{As}}, v_s\text{Ce-O}_{\text{bulk}}(\text{L}), v_s\text{Ce-O}_{\text{surf}}(\text{T})$                        |                                |
|                                     | 273.14  |  | 0.05 | $v_s\text{Ce-O}(\text{T}), \delta\text{As-O}_{\text{As}}$                                                                              |                                |
|                                     | 277.12  |  | 0.25 | $v_s\text{Ce-O}_{\text{bulk}}(\text{L}), v_s\text{Ce-O}_{\text{surf}}(\text{L})$                                                       |                                |
|                                     | 280.95  |  | 0.05 | $v_s\text{Ce-O}_{\text{bulk}}(\text{T}), v_s\text{Ce-O}_{\text{surf}}(\text{T})$                                                       |                                |
|                                     | 508.90  |  | 0.02 | $v_{\text{As}}\text{Ce-O}_{\text{bulk}}(\text{T}), v_{\text{As}}\text{Ce-O}_{\text{surf}}(\text{T})$                                   |                                |
|                                     | 683.24  |  | 0.01 | $v_{\text{As}}\text{O}_{\text{As-H}_{\text{As}}}, v_{\text{As}}\text{O}_{\text{As}}, \rho\text{O}_{\text{surf-H}_{\text{surf}}}$       |                                |
|                                     | 752.20  |  | 0.02 | $v_{\text{As}}\text{As-O}_{\text{As}}, \rho\text{O}_{\text{surf-H}_{\text{surf}}}$                                                     |                                |
|                                     | 779.20  |  | 0.01 | $v_{\text{As}}\text{As-O}_{\text{As}}, v_{\text{As}}\text{As-OH}_{\text{As}}, \rho\text{O}_{\text{surf-H}_{\text{surf}}}$              |                                |
|                                     | 3162    |  | 0.04 | $v\text{O}_{\text{surf-H}_{\text{surf}}}$                                                                                              |                                |
|                                     | 3481.31 |  | 0.02 | $v\text{O}_{\text{surf-H}_{\text{surf}}}$                                                                                              |                                |
|                                     | 173.54  |  |      | 0.05                                                                                                                                   | *Breathing mode of the surface |
|                                     | 175.90  |  |      | 0.11                                                                                                                                   | *Breathing mode of the surface |
|                                     | 220.04  |  |      | 0.05                                                                                                                                   | *Breathing mode of the surface |
|                                     | 227.12  |  |      | 0.08                                                                                                                                   | *Breathing mode of the surface |
| 234.09                              |         |  | 0.07 | $v_s\text{Ce-O}_{\text{surf}}(\text{L}), \rho\text{Ce-O}_{\text{bulk}}$                                                                |                                |
| 238.86                              |         |  | 0.13 | $\rho\text{Ce-O}_{\text{bulk}}(\text{L})$                                                                                              |                                |
| 239.63                              |         |  | 0.06 | $\rho\text{Ce-O}_{\text{bulk}}(\text{L}), \rho\text{O}_{\text{As-H}_{\text{As}}}$                                                      |                                |
| 245.63                              |         |  | 0.05 | $v_s\text{Ce-O}_{\text{surf}}(\text{L}), v_s\text{Ce-O}_{\text{bulk}}(\text{L}), \rho\text{O}_{\text{As-H}_{\text{As}}}$               |                                |
| 256.26                              |         |  | 0.06 | $\rho\text{Ce-O}_{\text{surf}}, \rho\text{Ce-O}_{\text{bulk}}$                                                                         |                                |
| 263.22                              |         |  | 0.15 | $\rho\text{Ce-O}_{\text{surf}}, \rho\text{Ce-O}_{\text{bulk}}$                                                                         |                                |
| 266.46                              |         |  | 0.22 | $v_s\text{Ce-O}_{\text{bulk}}(\text{L})$                                                                                               |                                |
| 269.77                              |         |  | 0.09 | $v_s\text{Ce-O}_{\text{bulk}}(\text{L}), \rho\text{Ce-O}_{\text{surf}}$                                                                |                                |
| 273.88                              |         |  | 0.12 | $\rho\text{Ce-O}_{\text{surf}}, \rho\text{Ce-O}_{\text{bulk}}, \rho\text{O}_{\text{As-H}_{\text{As}}}$                                 |                                |
| 274.27                              |         |  | 0.09 | $\rho\text{Ce-O}_{\text{surf}}, \rho\text{Ce-O}_{\text{bulk}}, \rho\text{O}_{\text{As-H}_{\text{As}}}, \delta\text{As-O}_{\text{As}}$  |                                |
| 282.07                              |         |  | 0.10 | $\rho\text{Ce-O}_{\text{surf}}, \rho\text{Ce-O}_{\text{bulk}}, \delta\text{As-O}_{\text{As}}$                                          |                                |
| 289.47                              |         |  | 0.13 | $\rho\text{Ce-O}_{\text{surf}}, \rho\text{Ce-O}_{\text{bulk}}, \delta\text{As-O}_{\text{As}}$                                          |                                |
| 292.22                              |         |  | 0.08 | $v_s\text{Ce-O}_{\text{bulk}}(\text{L}), \rho\text{O}_{\text{As-H}_{\text{As}}}, t\text{As-O}_{\text{As}}$                             |                                |
| 305.83                              |         |  | 0.11 | $v_{\text{As}}\text{Ce-O}_{\text{bulk}}(\text{T}), \delta\text{As-O}_{\text{As}}, \delta\text{O}_{\text{As-H}_{\text{As}}}$            |                                |
| 339.56                              |         |  | 0.10 | $v_{\text{As}}\text{Ce-O}_{\text{bulk}}(\text{L}), s\text{cAs-O}_{\text{As}}, \delta\text{As-O}_{\text{As}}$                           |                                |
| 343.39                              |         |  | 0.07 | $v_{\text{As}}\text{Ce-O}_{\text{bulk}}(\text{L}), t\text{As-O}_{\text{As}}$                                                           |                                |
| 356.89                              |         |  | 0.11 | $v_{\text{As}}\text{Ce-O}_{\text{surf}}(\text{L}), v_{\text{As}}\text{Ce-O}_{\text{bulk}}(\text{L}), t\text{As-O}_{\text{As}}$         |                                |
| 365.94                              |         |  | 0.08 | $v_{\text{As}}\text{Ce-O}_{\text{surf}}(\text{L}), v_{\text{As}}\text{Ce-O}_{\text{bulk}}(\text{L}), \rho\text{As-O}_{\text{As}}$      |                                |
| 365.95                              |         |  | 0.06 | $v_{\text{As}}\text{Ce-O}_{\text{surf}}(\text{L}), v_{\text{As}}\text{Ce-O}_{\text{bulk}}(\text{L}), \rho\text{As-O}_{\text{As}}$      |                                |
| 419.44                              |         |  | 0.18 | $v_s\text{Ce-O}_{\text{surf}}(\text{T}), v_s\text{Ce-O}_{\text{bulk}}(\text{T})$                                                       |                                |
| 422.24                              |         |  | 0.08 | $v_s\text{Ce-O}_{\text{surf}}(\text{T}), v_s\text{Ce-O}_{\text{bulk}}(\text{T})$                                                       |                                |
| 434.55                              |         |  | 0.14 | $v_s\text{Ce-O}_{\text{surf}}(\text{L}), v_s\text{Ce-O}_{\text{bulk}}(\text{L}), \delta\text{As-O}_{\text{As}}$                        |                                |
| 440.64                              |         |  | 0.06 | $v_s\text{Ce-O}_{\text{surf}}(\text{L}), v_s\text{Ce-O}_{\text{bulk}}(\text{L}), \delta\text{As-O}_{\text{As}}$                        |                                |
| 442.90                              |         |  | 0.16 | $v_s\text{Ce-O}_{\text{surf}}(\text{L}), v_s\text{Ce-O}_{\text{bulk}}(\text{L})$                                                       |                                |
| 445.32                              |         |  | 0.05 | $v_s\text{Ce-O}_{\text{surf}}(\text{T}), v_s\text{Ce-O}_{\text{bulk}}(\text{L})$                                                       |                                |
| 446.98                              |         |  | 0.06 | Complex $v\text{Ce-O}$                                                                                                                 |                                |
| 462.35                              |         |  | 0.06 | $v_s\text{Ce-O}_{\text{bulk}}(\text{T}), \omega\text{As-O}_{\text{As}}$                                                                |                                |
| 468.11                              |         |  | 0.07 | $v_s\text{Ce-O}_{\text{bulk}}(\text{T}), v_s\text{Ce-O}_{\text{surf}}(\text{L})$                                                       |                                |
| 470.94                              |         |  | 0.46 | $v_s\text{Ce-O}_{\text{bulk}}(\text{T}), v_s\text{Ce-O}_{\text{surf}}(\text{L})$                                                       |                                |
| 563.30                              |         |  | 0.09 | $v_s\text{Ce-O}_{\text{bulk}}(\text{T}), v_s\text{Ce-O}_{\text{surf}}(\text{L})$                                                       |                                |
| 574.85                              |         |  | 0.05 | Complex $v\text{Ce-O}$                                                                                                                 |                                |
| 671.15                              |         |  | 0.23 | Complex $v\text{Ce-O}_{\text{surf}}, v\text{Ce-O}_{\text{bulk}}$                                                                       |                                |
| 692.96                              |         |  | 0.45 | $v\text{As-OH}_{\text{As}}, \rho\text{O}_{\text{surf-H}_{\text{surf}}}, v_s\text{As-O}_{\text{As}}$                                    |                                |
| 718.22                              |         |  | 0.05 | $v_{\text{As}}\text{As-O}_{\text{As}}, \rho\text{O}_{\text{surf-H}_{\text{surf}}}$                                                     |                                |
| 718.37                              |         |  | 0.13 | $v_{\text{As}}\text{As-O}_{\text{As}}, \rho\text{O}_{\text{surf-H}_{\text{surf}}}$                                                     |                                |
| 778.45                              |         |  | 0.19 | $v_s\text{As-O}_{\text{As}}, \rho\text{O}_{\text{surf-H}_{\text{surf}}}, v\text{As-OH}_{\text{As}}$                                    |                                |
| 783.06                              |         |  | 0.11 | $v_{\text{As}}\text{O}_{\text{As-H}_{\text{As}}}, \rho\text{O}_{\text{surf-H}_{\text{surf}}}, v_{\text{As}}\text{As-O}_{\text{As}}$    |                                |
| 798.10                              |         |  | 0.53 | $v_{\text{As}}\text{O}_{\text{As-H}_{\text{As}}}, \rho\text{O}_{\text{surf-H}_{\text{surf}}}, v_s\text{As-O}_{\text{As}}$              |                                |
| 810.54                              |         |  | 0.04 | $v_{\text{As}}\text{As-O}_{\text{As}}, \rho\text{O}_{\text{surf-H}_{\text{surf}}}$                                                     |                                |
| 945.24                              |         |  | 0.50 | $v_{\text{As}}\text{O}_{\text{As-H}_{\text{As}}}, \rho\text{O}_{\text{surf-H}_{\text{surf}}}, v_{\text{As}}\text{As-O}_{\text{As}}$    |                                |
| 945.241                             |         |  | 0.34 | $v_{\text{As}}\text{O}_{\text{As-H}_{\text{As}}}, \rho\text{O}_{\text{surf-H}_{\text{surf}}}, v_{\text{As}}\text{As-O}_{\text{As}}$    |                                |
| 953.09                              |         |  | 1.00 | $v_{\text{As}}\text{As-O}_{\text{As}}, \rho\text{O}_{\text{surf-H}_{\text{surf}}}$                                                     |                                |
| 953.74                              |         |  | 0.25 | $v_{\text{As}}\text{As-O}_{\text{As}}, \rho\text{O}_{\text{surf-H}_{\text{surf}}}$                                                     |                                |
| 1001.78                             |         |  | 0.01 | $v_s\text{As-O}_{\text{As}}$                                                                                                           |                                |
| 1003.48                             |         |  | 0.06 | $v_s\text{As-O}_{\text{As}}, \rho\text{O}_{\text{surf-H}_{\text{surf}}}, \rho\text{O}_{\text{As-H}_{\text{As}}}$                       |                                |
| 3185.39                             |         |  | 0.10 | $\rho\text{O}_{\text{surf-H}_{\text{surf}}}, v\text{O}_{\text{As-H}_{\text{As}}}$                                                      |                                |
| 3185.41                             |         |  | 0.11 | $\rho\text{O}_{\text{surf-H}_{\text{surf}}}, v\text{O}_{\text{As-H}_{\text{As}}}$                                                      |                                |
| 3207.16                             |         |  | 0.13 | $v\text{O}_{\text{surf-H}_{\text{surf}}}$                                                                                              |                                |
| 3208.93                             |         |  | 0.08 | $v\text{O}_{\text{surf-H}_{\text{surf}}}$                                                                                              |                                |
| <b>{100}-4OAs-3O<sub>surf</sub></b> | 86.77   |  | 0.05 | *Breathing mode of surface and Arsenate                                                                                                |                                |
|                                     | 149.73  |  | 0.12 | *Breathing mode of surface                                                                                                             |                                |
|                                     | 152.63  |  | 0.09 | *Breathing mode of surface and Arsenate                                                                                                |                                |
|                                     | 269.94  |  | 0.42 | $v_s\text{Ce-O}_{\text{bulk}}(\text{L})$                                                                                               |                                |
|                                     | 270.96  |  | 0.38 | $v_s\text{Ce-O}_{\text{bulk}}(\text{L}), v_s\text{Ce-O}_{\text{surf}}(\text{T})$                                                       |                                |
|                                     | 416.81  |  | 0.10 | $v_{\text{As}}\text{Ce-O}_{\text{bulk}}(\text{T}), v_s\text{Ce-O}_{\text{surf}}(\text{T}), \rho\text{O}_{\text{surf-H}_{\text{surf}}}$ |                                |
|                                     | 626.06  |  | 0.09 | $\rho\text{O}_{\text{surf-H}_{\text{surf}}}, v_s\text{As-O}_{\text{As}}, v\text{As-OH}_{\text{As}}$                                    |                                |

|         |      |                                                                                                                                               |
|---------|------|-----------------------------------------------------------------------------------------------------------------------------------------------|
| 791.28  | 0.13 | $\nu_{\text{As-O}_{\text{As}}}, \rho_{\text{O}_{\text{surf}}-\text{H}_{\text{surf}}}$                                                         |
| 825.51  | 0.13 | $\nu_{\text{As-O}_{\text{As}}}, \rho_{\text{O}_{\text{surf}}-\text{H}_{\text{surf}}}$                                                         |
| 846.98  | 0.07 | $\nu_{\text{As-O}_{\text{As}}}, \nu_{\text{As-O}_{\text{As}}-\text{As-OH}_{\text{As}}}, \rho_{\text{O}_{\text{surf}}-\text{H}_{\text{surf}}}$ |
| 859.28  | 0.02 | $\nu_{\text{As-O}_{\text{As}}}, \rho_{\text{O}_{\text{surf}}-\text{H}_{\text{surf}}}, \rho_{\text{O}_{\text{As}}-\text{H}_{\text{As}}}$       |
| 1005.87 | 0.04 | $\rho_{\text{O}_{\text{As}}-\text{H}_{\text{As}}}$                                                                                            |
| 3348.4  | 0.13 | $\nu_{\text{O}_{\text{surf}}-\text{H}_{\text{surf}}}$                                                                                         |
| 3756.3  | 0.02 | $\nu_{\text{O}_{\text{surf}}-\text{H}_{\text{surf}}}$                                                                                         |

## References

- (1) Ta, K. M.; Cooke, D. J.; Gillie, L. J.; Parker, S. C.; Seal, S.; Wilson, P. B.; Phillips, R. M.; Skelton, J. M.; Molinari, M., Infrared and Raman Diagnostic Modeling of Phosphate Adsorption on Ceria Nanoparticles. *J. Phys. Chem. C* **2023**, *127*, 20183-20193
- (2) Brahim, A.; Mohamed Mongi, F.; Amor, H., Cerium Arsenate, Ceaso4. *Acta Crystallographica Section E* **2002**, *58*, i98-i99
